# Supplementary material for: Functions and biosynthesis of plant signaling metabolites mediating plant–microbe interactions
Source: Royal Society of Chemistry journal article supplement (doi:10.1039/d2np00010e), 2022-01-01
Supplement: d2np00010e1.pdf [file d2np00010e1.pdf]

**Supplementary Table 1. Origin and bioactivity of plant signaling metabolites.**

| Compound                                                              | Category | Subcategory   | Origin<br>(Either general or specific plants reported)                     | Function                                                                                                                                                                                                                                                                                         | Reference |
|-----------------------------------------------------------------------|----------|---------------|----------------------------------------------------------------------------|--------------------------------------------------------------------------------------------------------------------------------------------------------------------------------------------------------------------------------------------------------------------------------------------------|-----------|
| Linalool (1)                                                          | Terpene  | Monoterpene   | <i>Penstemon digitalis</i>                                                 | 1) Slow the growth rate of phyllosphere origin bacterial strains.<br>2) Promote the maximum density of nectary-source bacterial groups.                                                                                                                                                          | 31        |
| β-Caryophyllene (2)                                                   |          | Sesquiterpene | <i>Arabidopsis thaliana</i> ;<br>tomato<br>( <i>Solanum lycopersicum</i> ) | 1) Protect the <i>Arabidopsis</i> floral organ from <i>Pseudomonas syringae</i> pv <i>tomato</i> DC3000.<br>2) Shift the root microbiota composition of neighboring tomato plants.                                                                                                               | 32        |
| Capsidiol (3)                                                         |          | Sesquiterpene | Pepper and tobacco                                                         | 1) Act as a phytoalexin in response to pathogens including the potato late blight causer <i>Phytophthora infestans</i> .                                                                                                                                                                         | 33        |
| Kauralexin A1 (4)<br>Kauralexin B1 (5)                                |          | Diterpene     | Maize                                                                      | 1) Confer maize plants with tolerance of phytopathogenic microbes such as <i>Fusarium</i> spp., <i>Aspergillus</i> spp., <i>Collectotrichum</i> spp, <i>Rhizopus</i> microspores, and <i>Cochliobolus heterostrophus</i> .                                                                       | 36–38     |
| Epoxydolabrene (6)<br>Epoxydolabrranol (7)<br>Trihydroxydolabrene (8) |          | Diterpene     | Maize                                                                      | 1) Inhibit <i>Fusarium verticillioides</i> and <i>Fusarium graminearum</i> .<br>2) Modulate rhizosphere microbiome with pronounced change of Alphaproteobacteria.                                                                                                                                | 37, 39    |
| Momilactone A (9)<br>Momilactone B (10)                               |          | Diterpene     | Rice                                                                       | 1) Respond to fungal signals e.g., chitin.<br>2) Protect plant from rice blast caused by <i>Magnaporthe oryzae</i> .<br>3) Display <i>in vitro</i> antibacterial activities against <i>Bacillus pumilus</i> , <i>Pseudomonas ovalis</i> , <i>Escherichia coli</i> , and <i>Bacillus cereus</i> . | 41-45     |
| Phytocassane A (11)<br>Phytocassane B (12)                            |          | Diterpene     | Rice                                                                       | 1) Suppress pathogenic microbes such as <i>Pyricularia oryzae</i> , <i>Magnaporthe grisea</i> and <i>Magnaporthe oryzae</i> .                                                                                                                                                                    | 40        |
| Oryzalexin A (13)<br>Oryzalexin B (14)                                |          | Diterpene     | Rice                                                                       |                                                                                                                                                                                                                                                                                                  |           |
| 5,10-Diketo-casbene (15)                                              |          | Diterpene     | Rice <i>japonica</i> varieties                                             | 1) Offer plants bacterial blight resistance by inhibiting <i>M. oryzae</i> spore germination.                                                                                                                                                                                                    | 19,46,47  |

|                                                                                                         |                 |                |                                                                                      |                                                                                                                                                                                                                        |       |
|---------------------------------------------------------------------------------------------------------|-----------------|----------------|--------------------------------------------------------------------------------------|------------------------------------------------------------------------------------------------------------------------------------------------------------------------------------------------------------------------|-------|
|                                                                                                         |                 |                |                                                                                      | 2) Alleviate leaf disease symptoms caused by the <i>Xoo</i> strain.                                                                                                                                                    |       |
| Hordetriene (16)<br>11-Hydroxy-hordetriene (17)                                                         |                 | Diterpene      | Barely                                                                               | 1) Synthesis upon infections by bacterial and fungal pathogen not beneficial fungus.                                                                                                                                   | 48    |
| Dehydroabietinal (18)                                                                                   |                 | Diterpene      | Conifer                                                                              | 1) Activate systemic acquired resistance for tomato, tobacco, and <i>A. thaliana</i> .                                                                                                                                 | 50    |
| <i>ent</i> -Quiannulatene (19)                                                                          |                 | Sesterterpene  | <i>A. thaliana</i>                                                                   | 1) Reshape the composition of root microbiota, with changes of OTUs of Firmicutes, Proteobacteria, Actinobacteria, Planctomycetes, Verrucomicrobita, and Acidobacteria.                                                | 52    |
| Astellatene (20)                                                                                        |                 | Sesterterpene  | <i>A. thaliana</i>                                                                   |                                                                                                                                                                                                                        |       |
| Thalianin (21)                                                                                          |                 | Triterpene     | <i>A. thaliana</i>                                                                   | 1) Modulate the assembly of <i>A. thaliana</i> root bacterial microbiota, sustaining <i>Arenimonas</i> proliferation and suppressing <i>Arthrobacter</i> growth.                                                       | 18    |
| Arabidin (22)                                                                                           |                 | Triterpene     | <i>A. thaliana</i>                                                                   |                                                                                                                                                                                                                        |       |
| Avenacin A1 (23)<br>Avenacin B1 (24)                                                                    |                 | Triterpene     | Oat                                                                                  | 1) Provide plants with resistance to “take-all” caused by fungus <i>Gaeumannomyces tritici</i> .<br>2) Structure oat-associated rhizosphere eukaryotes.                                                                | 53-55 |
| Ginsenoside Rg1 (25)<br>Ginsenoside Rb1 (26)<br>Ginsenoside Rd (27)                                     |                 | Triterpene     | <i>Panax notoginseng</i>                                                             | 1) Drive <i>Panax notoginseng</i> associated soil microbiota.                                                                                                                                                          | 56    |
| Orobanchol (28)<br>5-Deoxystrigol (29)<br>Carlacton (30)<br>Carlactonoic acid (31)<br>Lotuslactone (32) |                 | Higher-terpene | various monocotyledonous and dicotyledonous plants, e.g., rice, soybean, and sorghum | 1) Establish plant-AMF association.<br>2) Steer rice plant rhizomicrobiome and promote beneficial bacteria.<br>3) Alter soybean rhizosphere microbial compositions.<br>4) Change sorghum rhizosphere bacterial groups. | 57-62 |
| Sakuranetin (33)                                                                                        | Phenylpropanoid | Flavonoid      | Rice                                                                                 | 1) Accumulate upon <i>Pyricularia oryzae</i> and <i>Magnaporthe grisea</i> attack.                                                                                                                                     | 40    |
| Glyceollin I (34)<br>Glyceollin III (35)                                                                |                 | Flavonoid      | Soybean                                                                              | 1) Serve as phytoalexins in response to fungi <i>Aspergillus</i> species, and <i>Rhizopus microspores</i> var. <i>oryzae</i> .                                                                                         | 65–67 |
| Medicarpin (36)                                                                                         |                 | Flavonoid      | Medicago                                                                             | 1) Act as a phytoalexin in response to fungus <i>Phoma medicaginis</i> .                                                                                                                                               |       |
| Maackiaian (37)                                                                                         |                 | Flavonoid      | Chickpea                                                                             | 1) Induced synthesis by elicitor k-carrageenan.                                                                                                                                                                        |       |
| Pisatin (38)                                                                                            |                 | Flavonoid      | Pea                                                                                  | 1) Produced upon pathogen <i>Nectria haematococca</i> MPVI infection.<br>2) Induced synthesis by elicitor k-carrageenan.                                                                                               |       |

|                                   |                      |              |                                    |                                                                                                                                                                                                                                                                                                                                           |       |
|-----------------------------------|----------------------|--------------|------------------------------------|-------------------------------------------------------------------------------------------------------------------------------------------------------------------------------------------------------------------------------------------------------------------------------------------------------------------------------------------|-------|
| Apigenin (39)                     |                      | Flavonoid    | A range of legume plants and maize | 1) Induce host nodulation and establish plant-rhizobia symbiotic connection.<br>2) Respond to infection by fungus <i>Colletotrichum graminicola</i> in maize plants.<br>3) Coordinate maize-special rhizosphere microorganisms, enriching <i>Massilia</i> genus and <i>Oxalobacteraceae</i> family<br>4) Enhance plant field performance. | 13,68 |
| Daidzein (40)<br>Genistein (41)   |                      | Flavonoid    | Legumes, e.g., soybean             | 1) Trigger soybean- <i>Bradyrhizobium</i> and legume- <i>Rhizobium</i> sp. NGR234 symbiosis but repress several <i>Rhizobium</i> strains.                                                                                                                                                                                                 | 68    |
| Scopoletin (42)                   |                      | Coumarin     | <i>A. thaliana</i>                 | 1) Shape rhizomicrobiome, sustain beneficial microbes such as bacterium <i>P. simiae</i> WCS417 <i>P. capeferrum</i> WCS358 but repressing pathogenic fungi <i>F. oxysporum</i> and <i>V. dahlia</i> .<br>2) Sculpt the assembly of microbiome, enriching <i>Pseudomonas</i> species.                                                     | 22    |
| Fraxetin (43)                     |                      | Coumarin     | <i>A. thaliana</i>                 | 1) Alter the root microbiota and enhance plant growth under iron-restricted condition, selecting iron-beneficial commensal strains.                                                                                                                                                                                                       | 71    |
| Daphnetin (44)                    |                      | Coumarin     | Different plant sources            | 1) Inhibit phytopathogenic microbes such as <i>R. solanacearum</i> .                                                                                                                                                                                                                                                                      | 72    |
| Resveratrol (45)                  |                      | Stilbene     | Vitaceae plants                    | 1) Respond to fungal attacks from <i>B. cinerea</i> , <i>P. viticola</i> and <i>U. necator</i> .                                                                                                                                                                                                                                          | 74    |
| Pterostilbene (46)                |                      | Stilbene     | Vitaceae plants                    | 1) Enhance plant resistance to the pathogen <i>Rhizoctonia solani</i> and reduce root necrosis in pterostilbene-expressed soybeans.                                                                                                                                                                                                       | 76,77 |
| $\epsilon$ -Viniferin (47)        |                      | Stilbene     | Vitaceae plants                    | 1) Accumulate upon infection by <i>Plasmopara viticola</i> and <i>Erysiphe necator</i> .                                                                                                                                                                                                                                                  | 75    |
| <i>p</i> -Coumaroyl-tyramine (48) |                      | Phenolamides | Pepper and others                  | 1) Inhibit growth of pathogenic fungus <i>Xanthomonas campestris</i> .                                                                                                                                                                                                                                                                    | 78    |
| <i>N</i> -feruloyl-tyramine (49)  |                      | Phenolamides |                                    |                                                                                                                                                                                                                                                                                                                                           |       |
| Avenanthramide a (50)             |                      | Phenolamides | Oat                                | 1) Correlates to defense against crown rust in a concentration-dependent manner.                                                                                                                                                                                                                                                          | 78    |
| Cinnamoyltyramine (51)            |                      | Phenolamides | Rice                               | 1) Protect plant against bacteria <i>Xoo</i> and fungus <i>Magnaporthe oryzae</i> along with phytoalexins synthesis.                                                                                                                                                                                                                      | 82    |
| Camalexin (52)                    | <i>N</i> -containing | Alkaloid     | <i>Arabidopsis</i>                 | 1) Affect the rhizosphere microbiome.                                                                                                                                                                                                                                                                                                     | 24    |
| Spirobrassinin (53)               |                      | Alkaloid     | <i>Brassica rapa</i> and           | 1) Respond to pathogens <i>Albugo candida</i> and                                                                                                                                                                                                                                                                                         | 88,89 |

|                                                          |                       |                             |                                              |                                                                                                                                                                                                                                                                                                                                        |                                                                                                                                                                                                                                                             |
|----------------------------------------------------------|-----------------------|-----------------------------|----------------------------------------------|----------------------------------------------------------------------------------------------------------------------------------------------------------------------------------------------------------------------------------------------------------------------------------------------------------------------------------------|-------------------------------------------------------------------------------------------------------------------------------------------------------------------------------------------------------------------------------------------------------------|
| Rutalexin (54)                                           | compound              |                             | <i>Brassica juncea</i>                       | <i>Alternaria brassicola</i> .                                                                                                                                                                                                                                                                                                         |                                                                                                                                                                                                                                                             |
| Brassilexin (55)                                         |                       |                             |                                              |                                                                                                                                                                                                                                                                                                                                        |                                                                                                                                                                                                                                                             |
| 4-OH-ICN (56)                                            |                       | Cyanogenic compound         | <i>Arabidopsis</i>                           | 1) Maintain plant resistance to <i>P. syringae</i> pv. <i>tomato</i> DC3000.<br>2) Inhibit growth of fungi <i>Alternaria brassicicola</i> and <i>Botrytis cinerea</i> .                                                                                                                                                                | 21                                                                                                                                                                                                                                                          |
| DIMBOA (57)<br>MBOA (58)<br>HM <sub>2</sub> BOA-Glc (59) |                       | Benzoxazinoid               | Poaceae family plants, e.g., maize           | 1) Impede the growth of pathogenic <i>Staphylococcus aureus</i> but promote PGP bacterium <i>Pseudomonas putida</i> .<br>2) Tailor microbial communities in both aboveground and belowground parts of plants.                                                                                                                          | 94-98                                                                                                                                                                                                                                                       |
| Zeaoxazolinone (60)                                      |                       | Benzoxazinoid               |                                              | 1) Possess antimicrobial properties against <i>Aspergillus flavus</i> and <i>Candida albicans</i> .                                                                                                                                                                                                                                    | 95                                                                                                                                                                                                                                                          |
| Phenoxazine (61)                                         |                       | Benzoxazinoid               |                                              | 1) Display antibacterial activity <i>in vitro</i> .<br>2) Contribute to the stability of microbial assemblage.                                                                                                                                                                                                                         | 99                                                                                                                                                                                                                                                          |
| Sulforaphane (62)                                        | S-containing compound | Glucosinolate               | Brassicales plants                           | 1) Inhibit <i>P. syringae</i> strains by interfering with microbial type III secretion system.                                                                                                                                                                                                                                         | 103                                                                                                                                                                                                                                                         |
| 2-Phenylethylisothiocyanate (63)                         |                       | Glucosinolate               | Brassicales plants                           | 1) Control a pea disease via soil amendments or plant rotations via altering rhizosphere bacterial community.                                                                                                                                                                                                                          | 105                                                                                                                                                                                                                                                         |
| <i>p</i> -Hydroxybenzylglucosinolate (64)                |                       | Glucosinolate               | Brassicales plants, e.g., <i>Arabidopsis</i> | 1) Shape rhizosphere microbiota.<br>2) Establish and maintain relationship between plants and endophytic fungi, e.g., <i>Serendipita indica</i><br>3) Sustain beneficial microbe <i>Colletotrichum tofieldiae</i>                                                                                                                      | 106                                                                                                                                                                                                                                                         |
| Indole glucosinolates, e.g., neoglucobrassicin (65)      |                       | Glucosinolate               | <i>Arabidopsis</i>                           | 1) Contain the overgrowth of <i>Colletotrichum tofieldiae</i> fungus.<br>2) Enable the establishment of beneficial roles for plants grown in phosphate-deficient conditions.                                                                                                                                                           | 108                                                                                                                                                                                                                                                         |
| Alliin (66)                                              |                       | S-alkyl-cysteine sulfoxides | Alliaceae plants                             | 1) Show antibacterial and antifungal properties against <i>Agrobacterium tumefaciens</i> , <i>Erwinia carotovora</i> , <i>P. syringae</i> , <i>Xanthomonas campestris</i> , <i>A. brassicicola</i> , <i>B. cinerea</i> , <i>Magnaporthe grisea</i> , Oomycete <i>Phytophthora</i> , <i>Plectosphaerella cucumerina</i> , among others. | 109                                                                                                                                                                                                                                                         |
| Falcarindiol (67)                                        |                       | Other                       | Acetylenic fatty acids                       | Slanaceous species, e.g., tomato and eggplant                                                                                                                                                                                                                                                                                          | 1) Produced upon induction by <i>Cladosporium fulvum</i> , <i>Fusarium oxysporum</i> , and <i>Verticillium albo-atrum</i> .<br>2) Correlate with plant immunity with fungus <i>B. cinerea</i> and bacteria <i>X. euvesicatoria</i> and <i>P. syringae</i> . |
| Acyl sugars, e.g.,                                       | Acyl sugars           |                             | Caryophyllaceae,                             | 1) Reduce tobacco specific fungi (i.e., <i>Fusarium</i> and                                                                                                                                                                                                                                                                            | 122, 123                                                                                                                                                                                                                                                    |

|                                                |  |  |                                                                                   |                                                                                                                                                                                                                                                                                                                                                                                                                                                    |  |
|------------------------------------------------|--|--|-----------------------------------------------------------------------------------|----------------------------------------------------------------------------------------------------------------------------------------------------------------------------------------------------------------------------------------------------------------------------------------------------------------------------------------------------------------------------------------------------------------------------------------------------|--|
| <p>S3:18(2,8,8) (68)<br/>S3:17(2,7,8) (69)</p> |  |  | <p>Geraniaceae, Martyniaceae, and Solanaceae plants, e.g., tobacco and tomato</p> | <p><i>Alternaria</i>) spore germination.<br/>2) Enhance protection from infection of phytopathogens, <i>B. cinerea</i> and <i>Pseudomonas viridiflava</i> when <i>Arabidopsis</i> treated with acyl glycosides.<br/>3) Induce soybean immunity against the disease target spot.<br/>4) Contribute to the formation of trichome-specific microbiota.<br/>5) Interplay between tomato plants and bacterial strain <i>Bacillus subtilis</i> 3610.</p> |  |
|------------------------------------------------|--|--|-----------------------------------------------------------------------------------|----------------------------------------------------------------------------------------------------------------------------------------------------------------------------------------------------------------------------------------------------------------------------------------------------------------------------------------------------------------------------------------------------------------------------------------------------|--|
